# Supplementary figures and images for: Modeling influenza epidemics and pandemics: insights into the future of swine flu (H1N1)
Source: Springer Nature journal article supplement (doi:10.1186/1741-7015-7-30), 2009-06-22

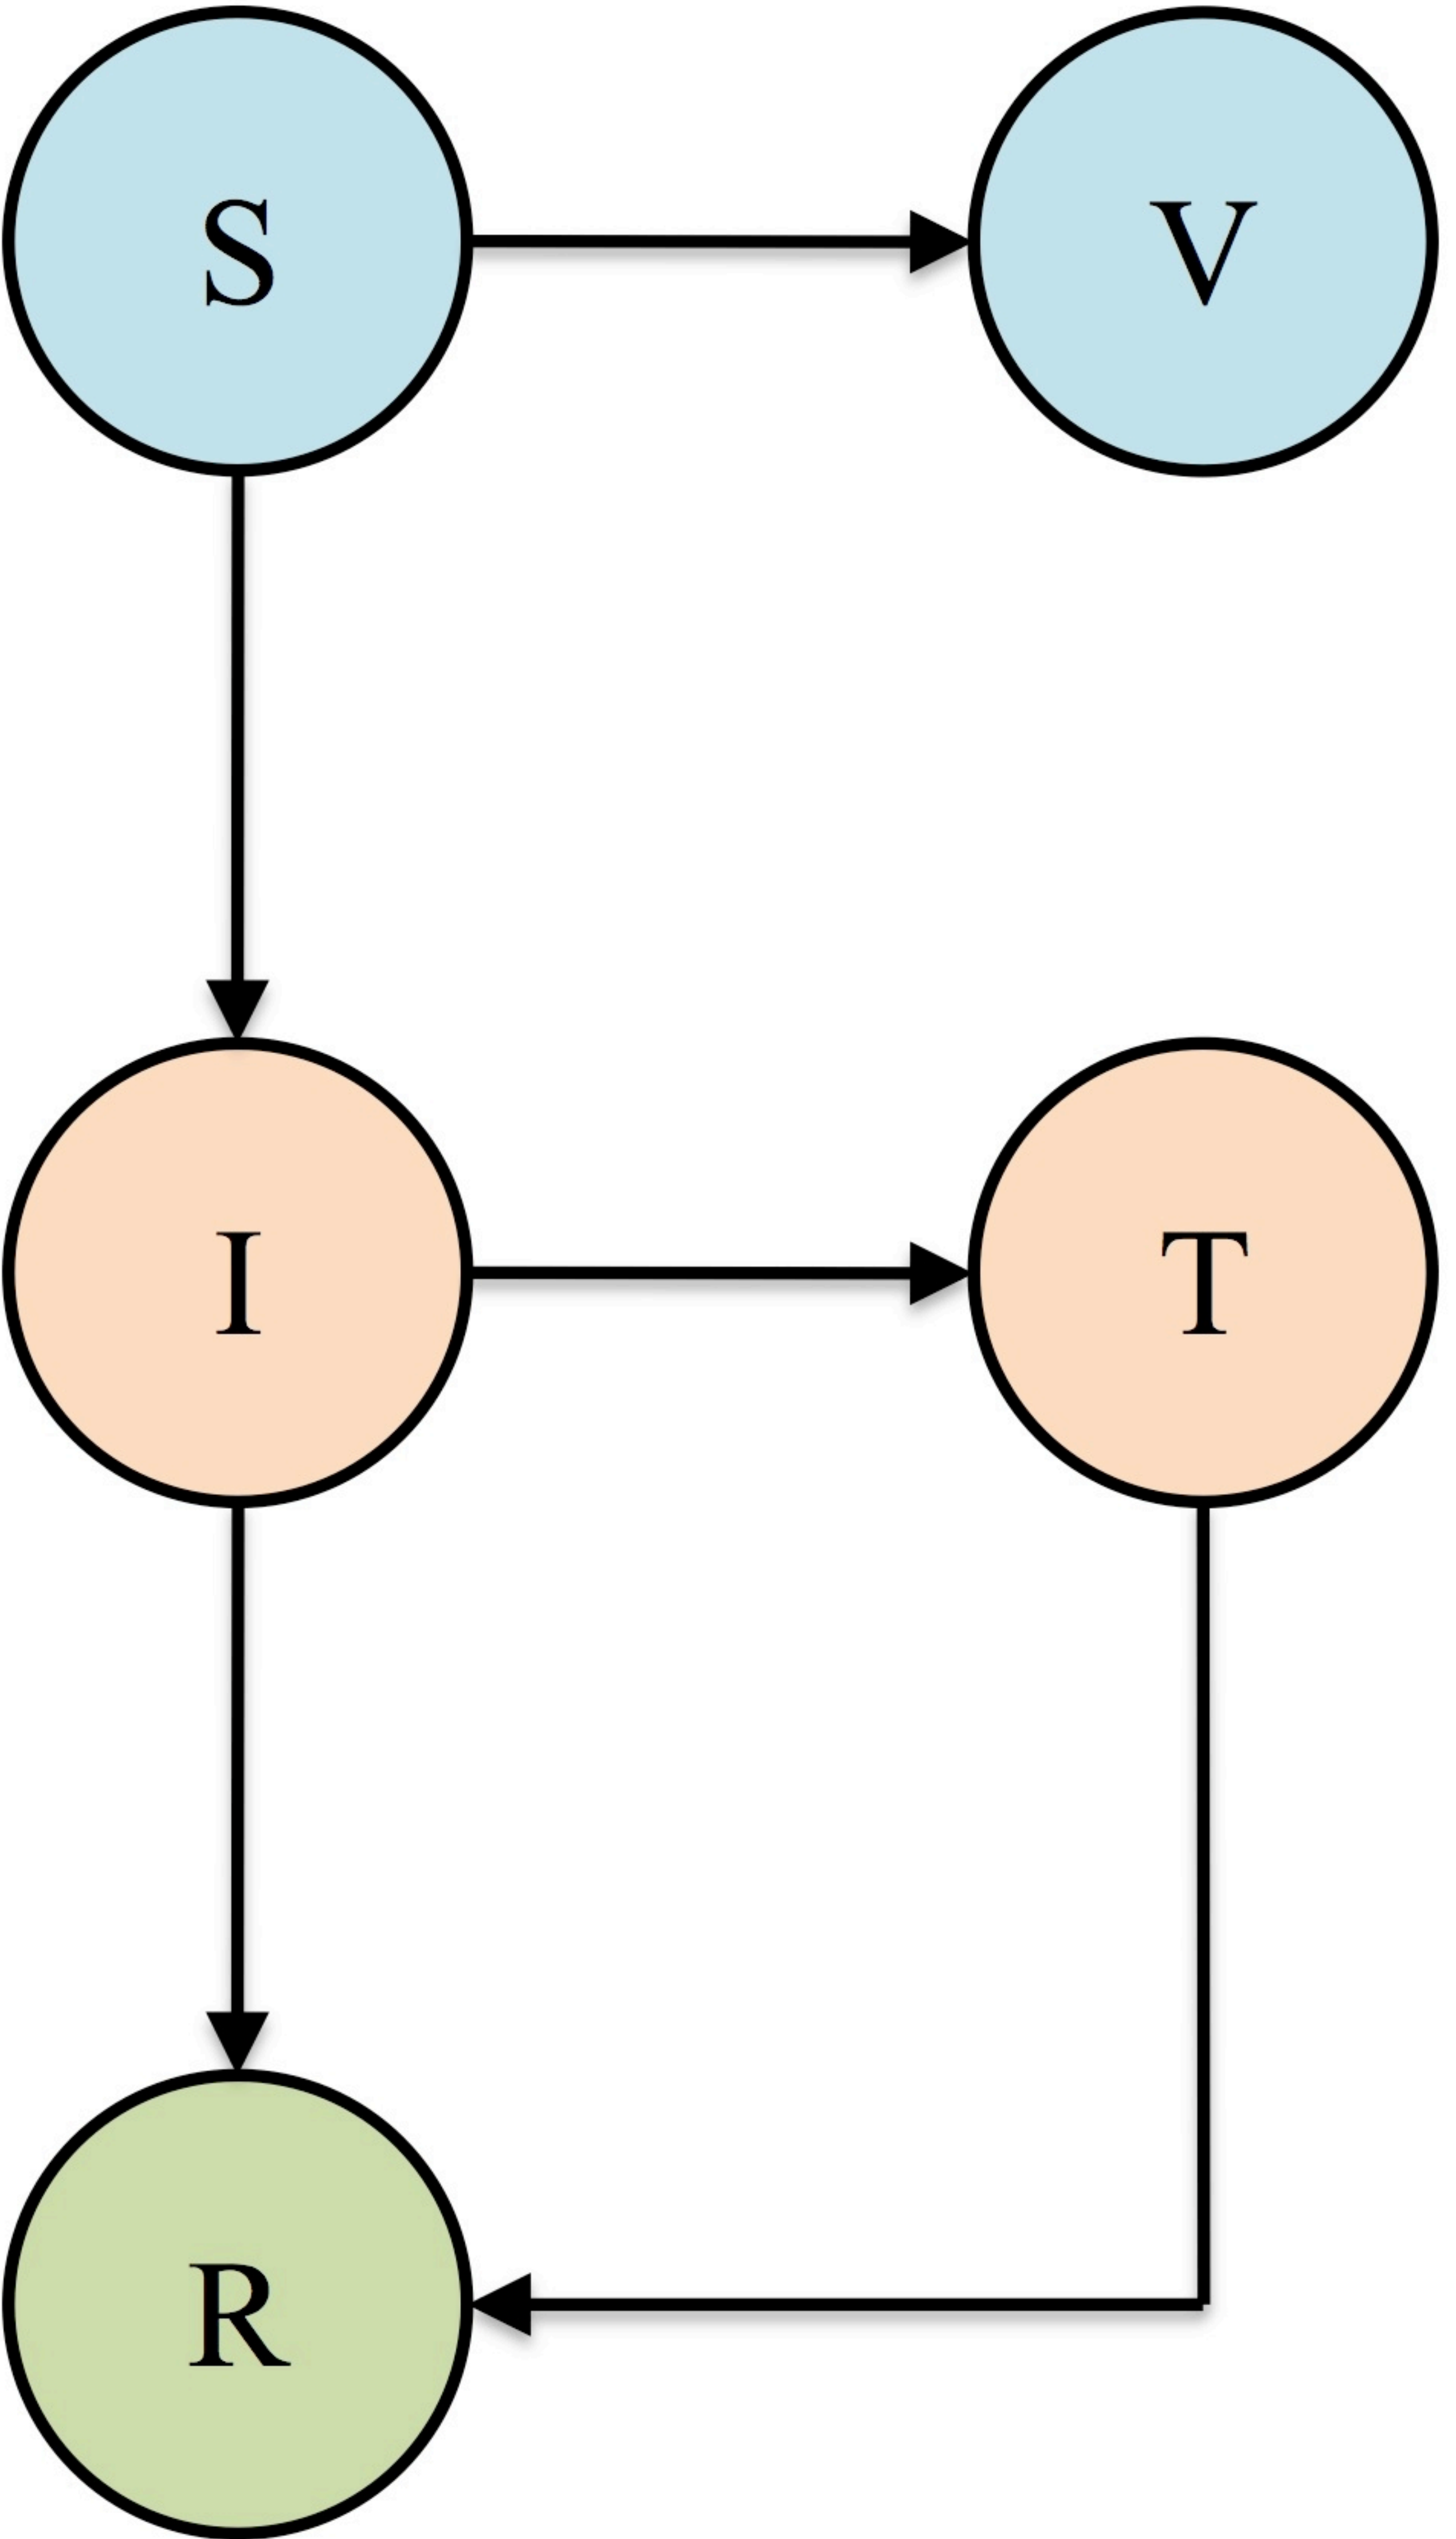

Supplement: 12916_2009_208_MOESM3_ESM.pdf [file 12916_2009_208_MOESM3_ESM.pdf]

Degree of Interaction

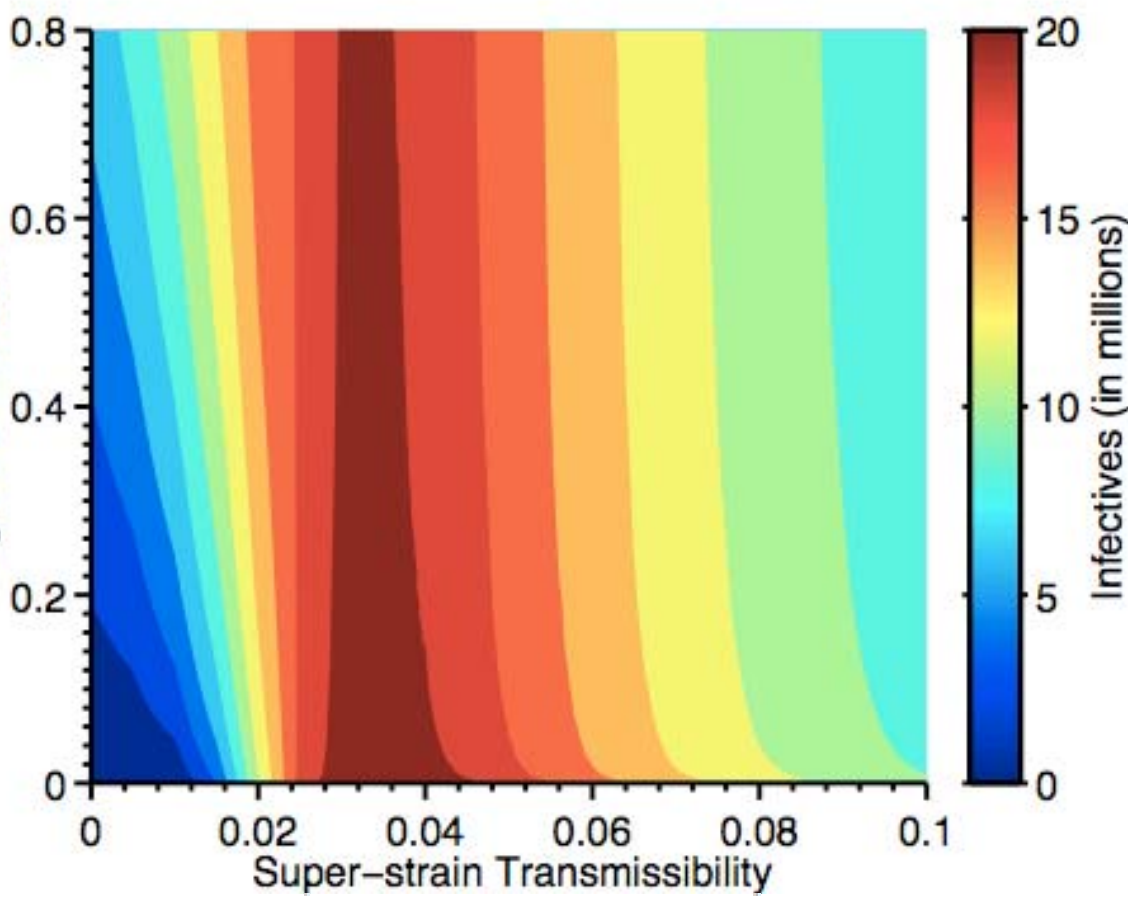

Super-strain Transmissibility

Infectives (in millions)

Supplement: 12916_2009_208_MOESM5_ESM.pdf [file 12916_2009_208_MOESM5_ESM.pdf]
